# Supplementary material
Source: PubMed Central journal article supplement (PMC4338922)
Supplement: jp503222v_si_001.pdf [file jp503222v_si_001.pdf]

## SUPPORTING INFORMATION

### Infrared multiple photon dissociation spectroscopy of a gas-phase oxo-molybdenum complex with 1,2-dithiolene ligands

Michael J. van Stipdonk<sup>1\*</sup>, Partha Basu<sup>1\*</sup>, Sara Dille<sup>1</sup>, John K. Gibson<sup>2</sup>, Giel Berden<sup>3</sup> and Jos Oomens<sup>3,4</sup>

<sup>1</sup>Department of Chemistry and Biochemistry, Duquesne University, 600 Forbes Ave, Pittsburgh PA 15282 USA

<sup>2</sup>Chemical Sciences Division, Lawrence Berkeley National Laboratory, 1 Cyclotron Road, Berkeley, CA 94720 USA

<sup>3</sup>Radboud University Nijmegen, Institute for Molecules and Materials, FELIX Facility, Toernooiveld 7, 6525ED Nijmegen, The Netherlands

<sup>4</sup>van 't Hoff Institute for Molecular Sciences, University of Amsterdam, Science Park 904, 1098XH Amsterdam, The Netherlands

Figure S1. CID spectra generated from solution of  $\text{MoO}(\text{mnt})_2^{2-}$ : (a) CID (MS/MS stage) of  $m/z$  524. (b) CID ( $\text{MS}^3$  stage) of  $m/z$  423 product derived from  $m/z$  524 precursor.

Figure S2. CID spectra generated from solution of  $\text{MoO}(\text{mnt})_2^{2-}$ : (a) CID (MS/MS stage) of  $m/z$  197, (b) CID ( $\text{MS}^3$  stage) of  $m/z$  394 product derived from  $m/z$  197 precursor.

Figure S3. Comparison of IRMPD and predicted spectra for cyano-coordinated  $\text{Mo}=\text{O}$ : (a) structure III and (b) structure IV.

Figure S4. Data for IRMPD of  $[\text{MoO}(\text{mnt})_2]^{2-}$ : (a) experimental IRMPD spectrum and (b) predicted spectrum for  $[\text{MoO}(\text{mnt})_2]^{2-}$  in singlet spin state at M06-L/6-311+G(d) level of theory. IRMPD spectrum is included as grey trace in (b) to facilitate comparison.

Figure S5. Data for IRMPD of  $[\text{MoO}(\text{mnt})_2]^{2-}$ : (a) experimental IRMPD spectrum and (b) predicted spectrum for  $[\text{MoO}(\text{mnt})_2]^{2-}$  in singlet spin state at B3LYP/6-311+G(3df) level of theory. IRMPD spectrum is included as grey trace in (b) to facilitate comparison.

Figure S6. Data for IRMPD of  $[\text{MoO}(\text{mnt})_2]^-$ : (a) experimental IRMPD spectrum, (b) predicted spectrum for  $[\text{MoO}(\text{mnt})_2]^-$  in doublet spin state and (c) predicted spectrum for  $[\text{MoO}(\text{mnt})_2]^-$  in quartet spin state. Predicted spectra are from calculations at the M06-L/6-311+G(d) level of theory. IRMPD spectrum is included as grey trace in (b) and (c) to facilitate comparison.

Figure S7. Data for IRMPD of  $[\text{MoO}(\text{mnt})_2]^-$ : (a) experimental IRMPD spectrum, (b) predicted spectrum for  $[\text{MoO}(\text{mnt})_2]^-$  in doublet spin state and (c) predicted spectrum for  $[\text{MoO}(\text{mnt})_2]^-$  in quartet spin state. Predicted spectra are from calculations at the B3LYP/6-311+G(3df) level of theory. IRMPD spectrum is included as grey trace in (b) and (c) to facilitate comparison.

Figure S8. General structure for  $\text{MoO}(\text{mnt})_2^{n-}$  with atom labels

Table S1. Dihedral angles predicted for  $\text{MoO}(\text{mnt})_2^-$  and  $\text{MoO}(\text{mnt})_2^{2-}$ .

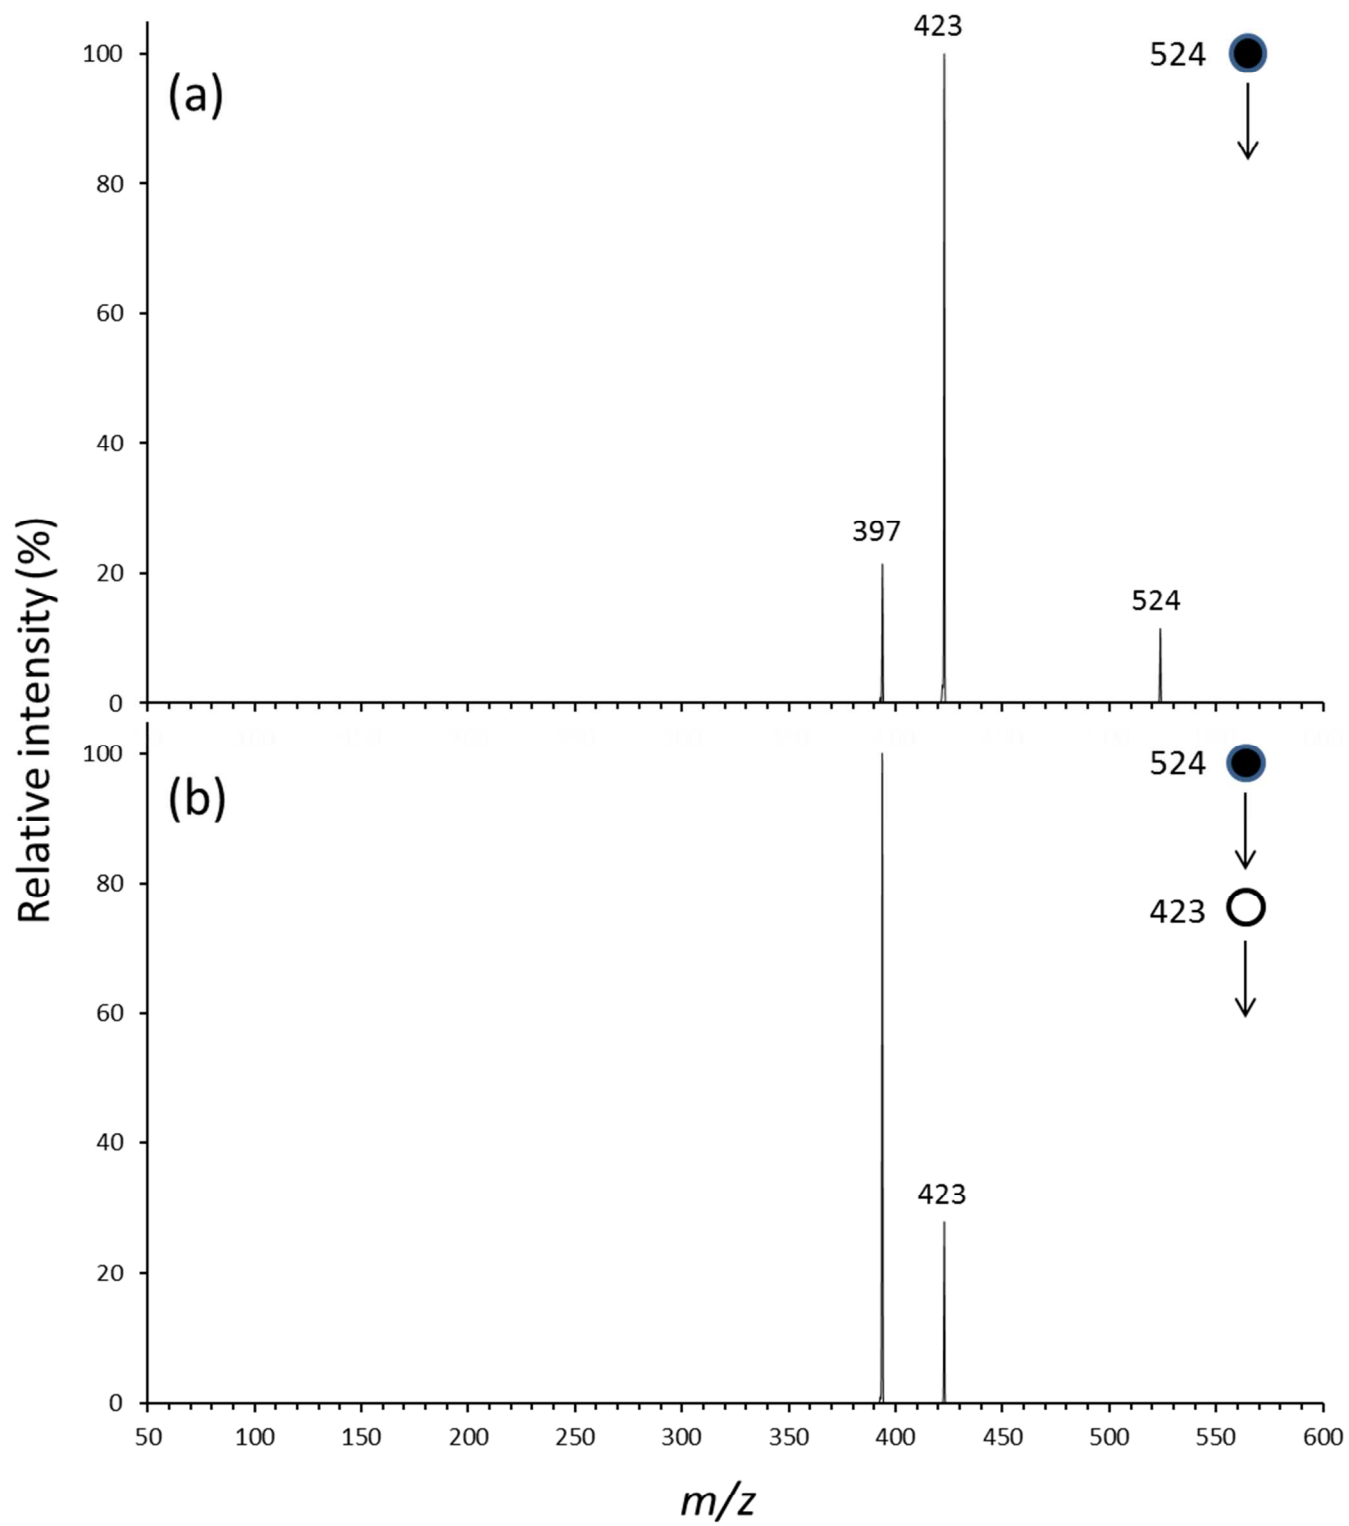

Figure S1.

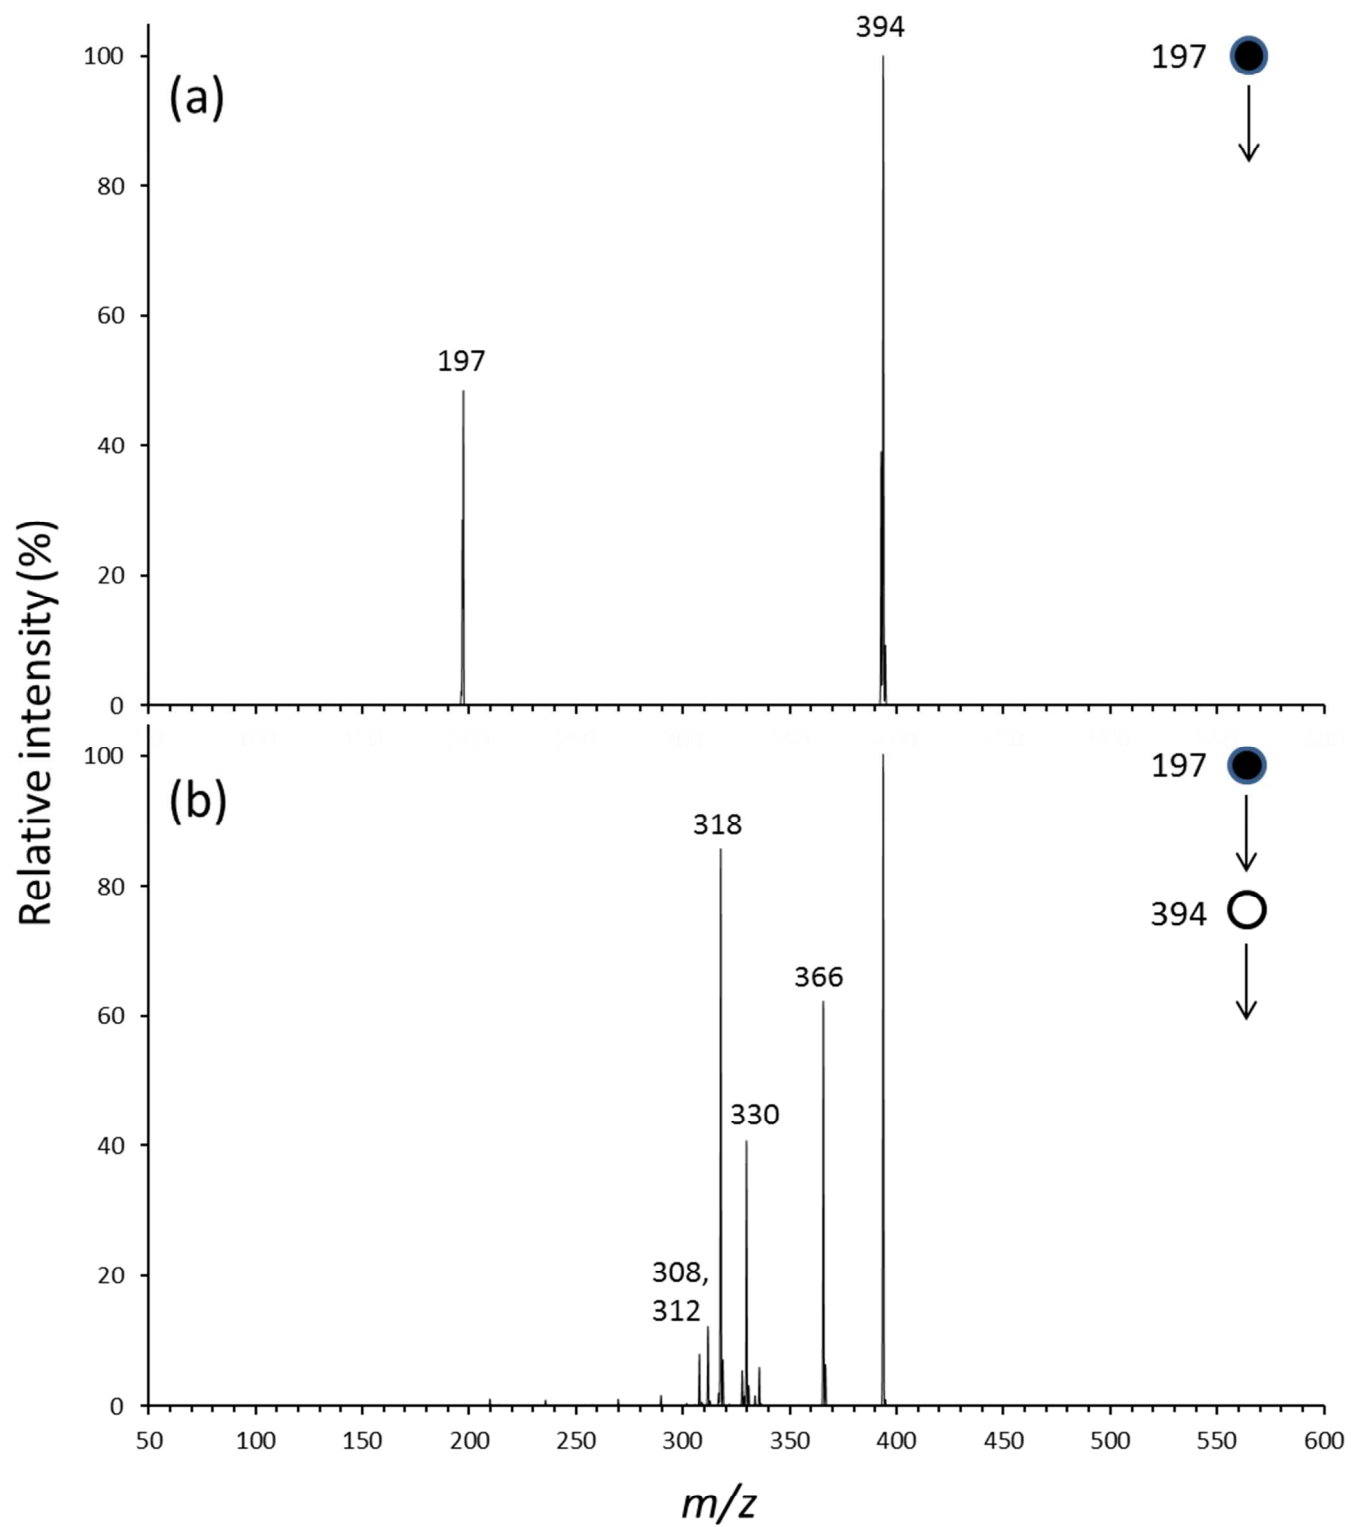

Figure S2.

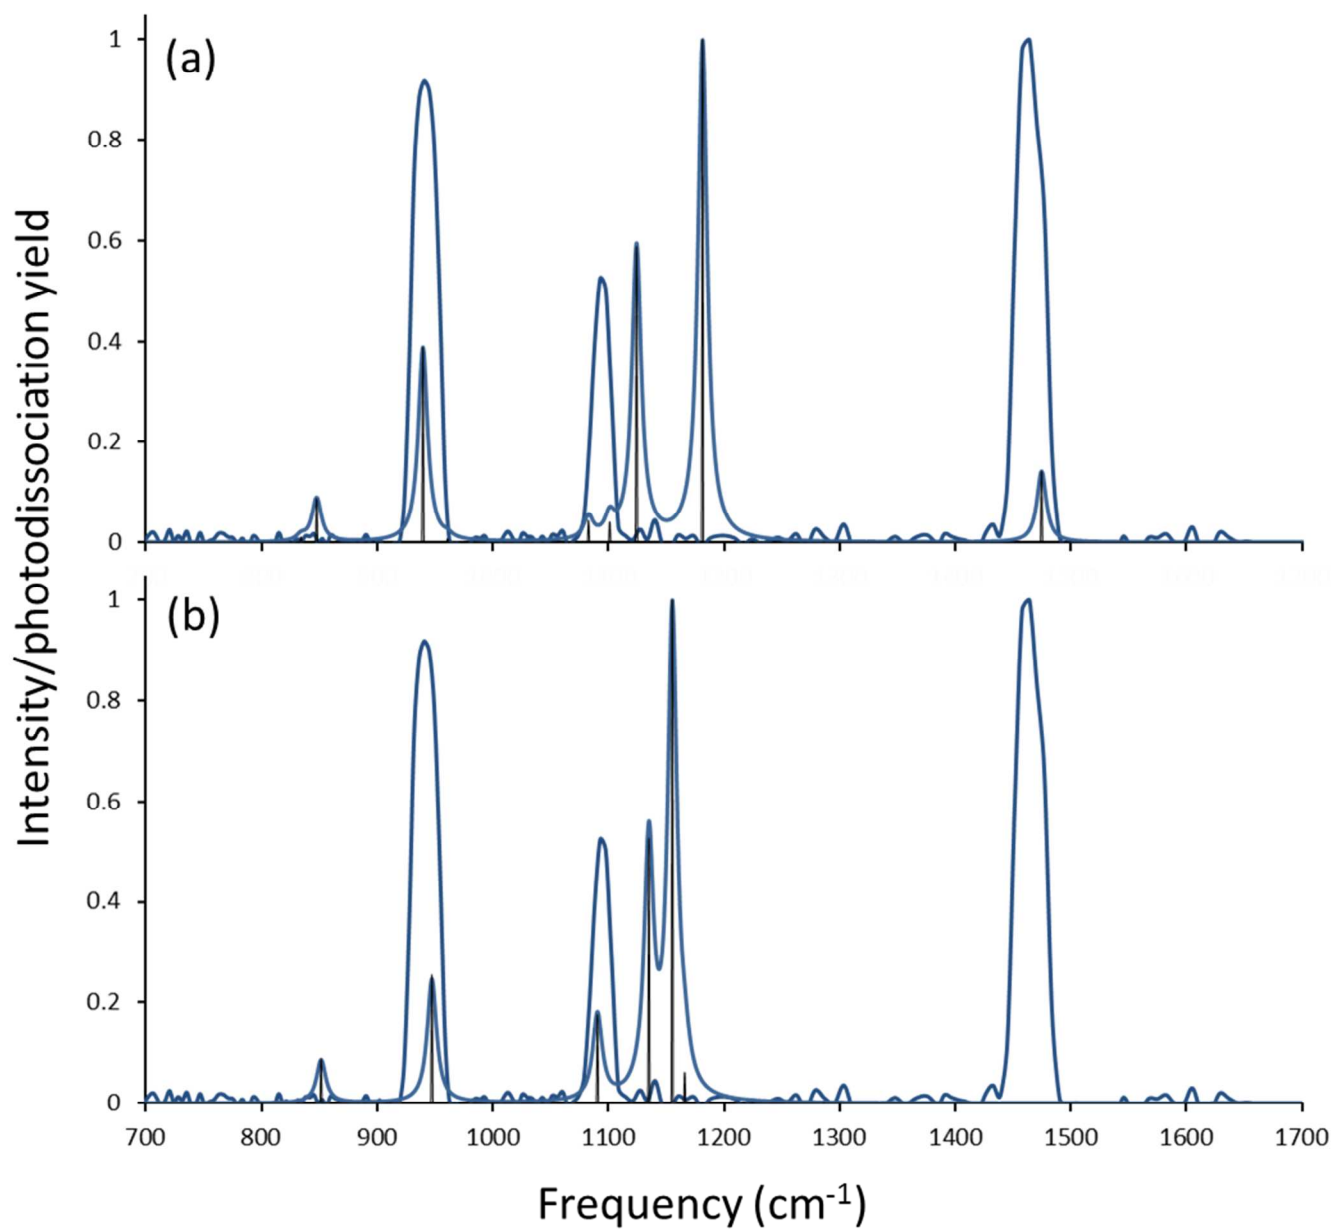

Figure S3.

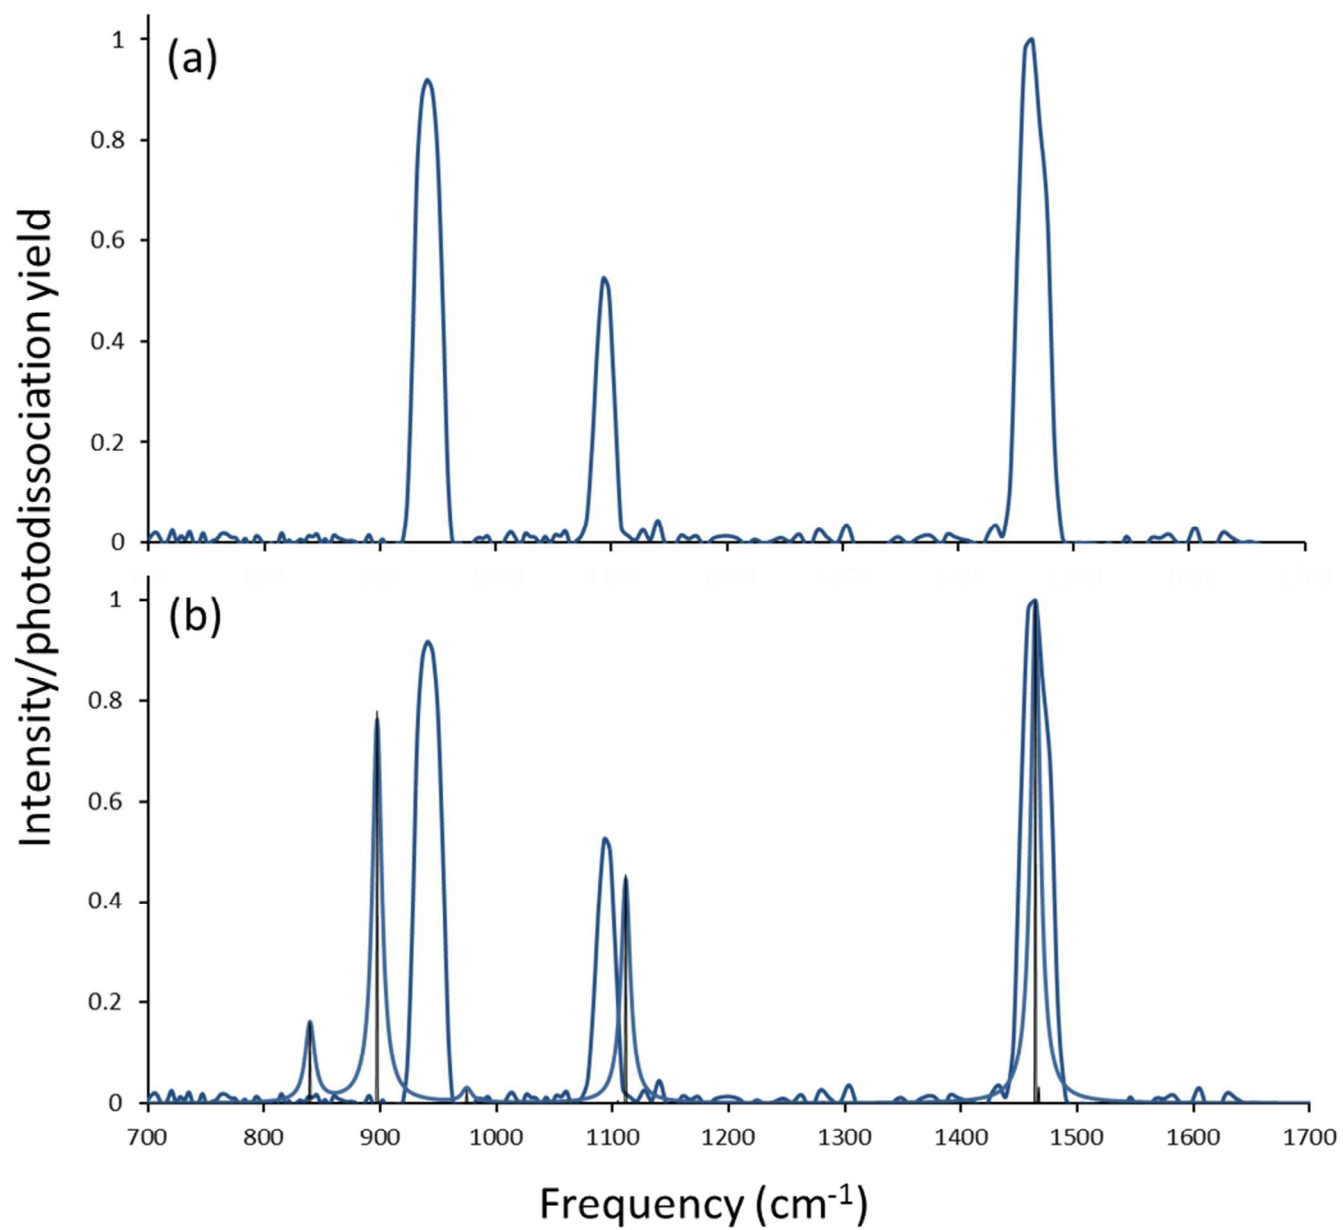

Figure S4.

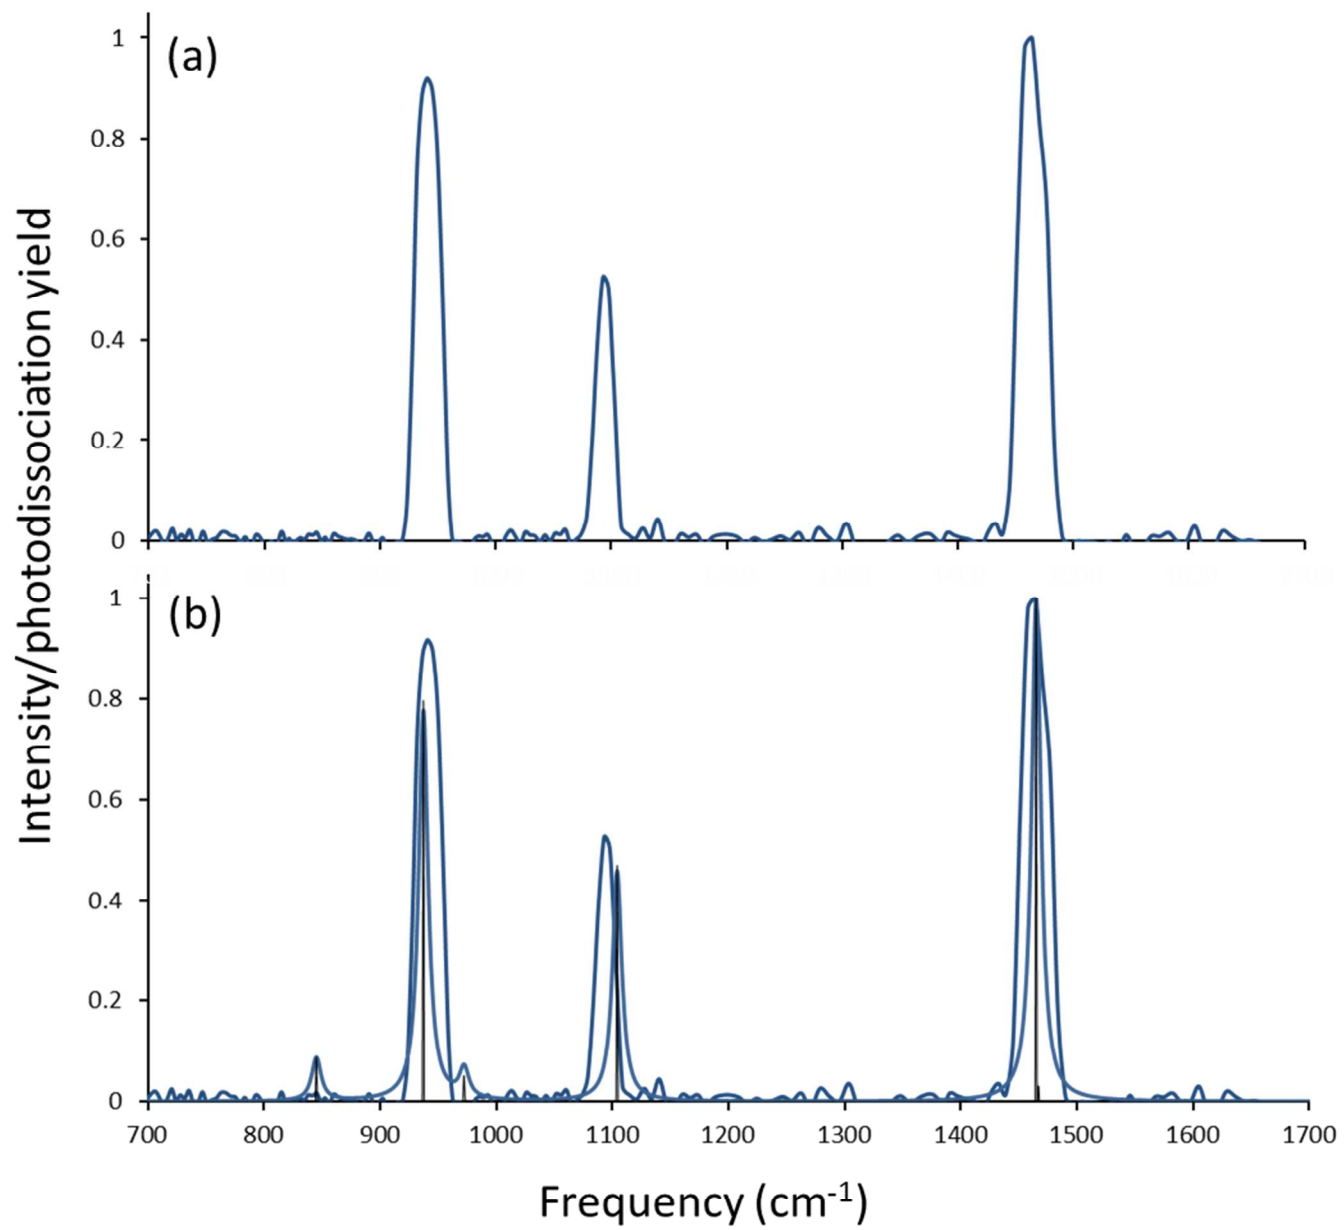

Figure S5.

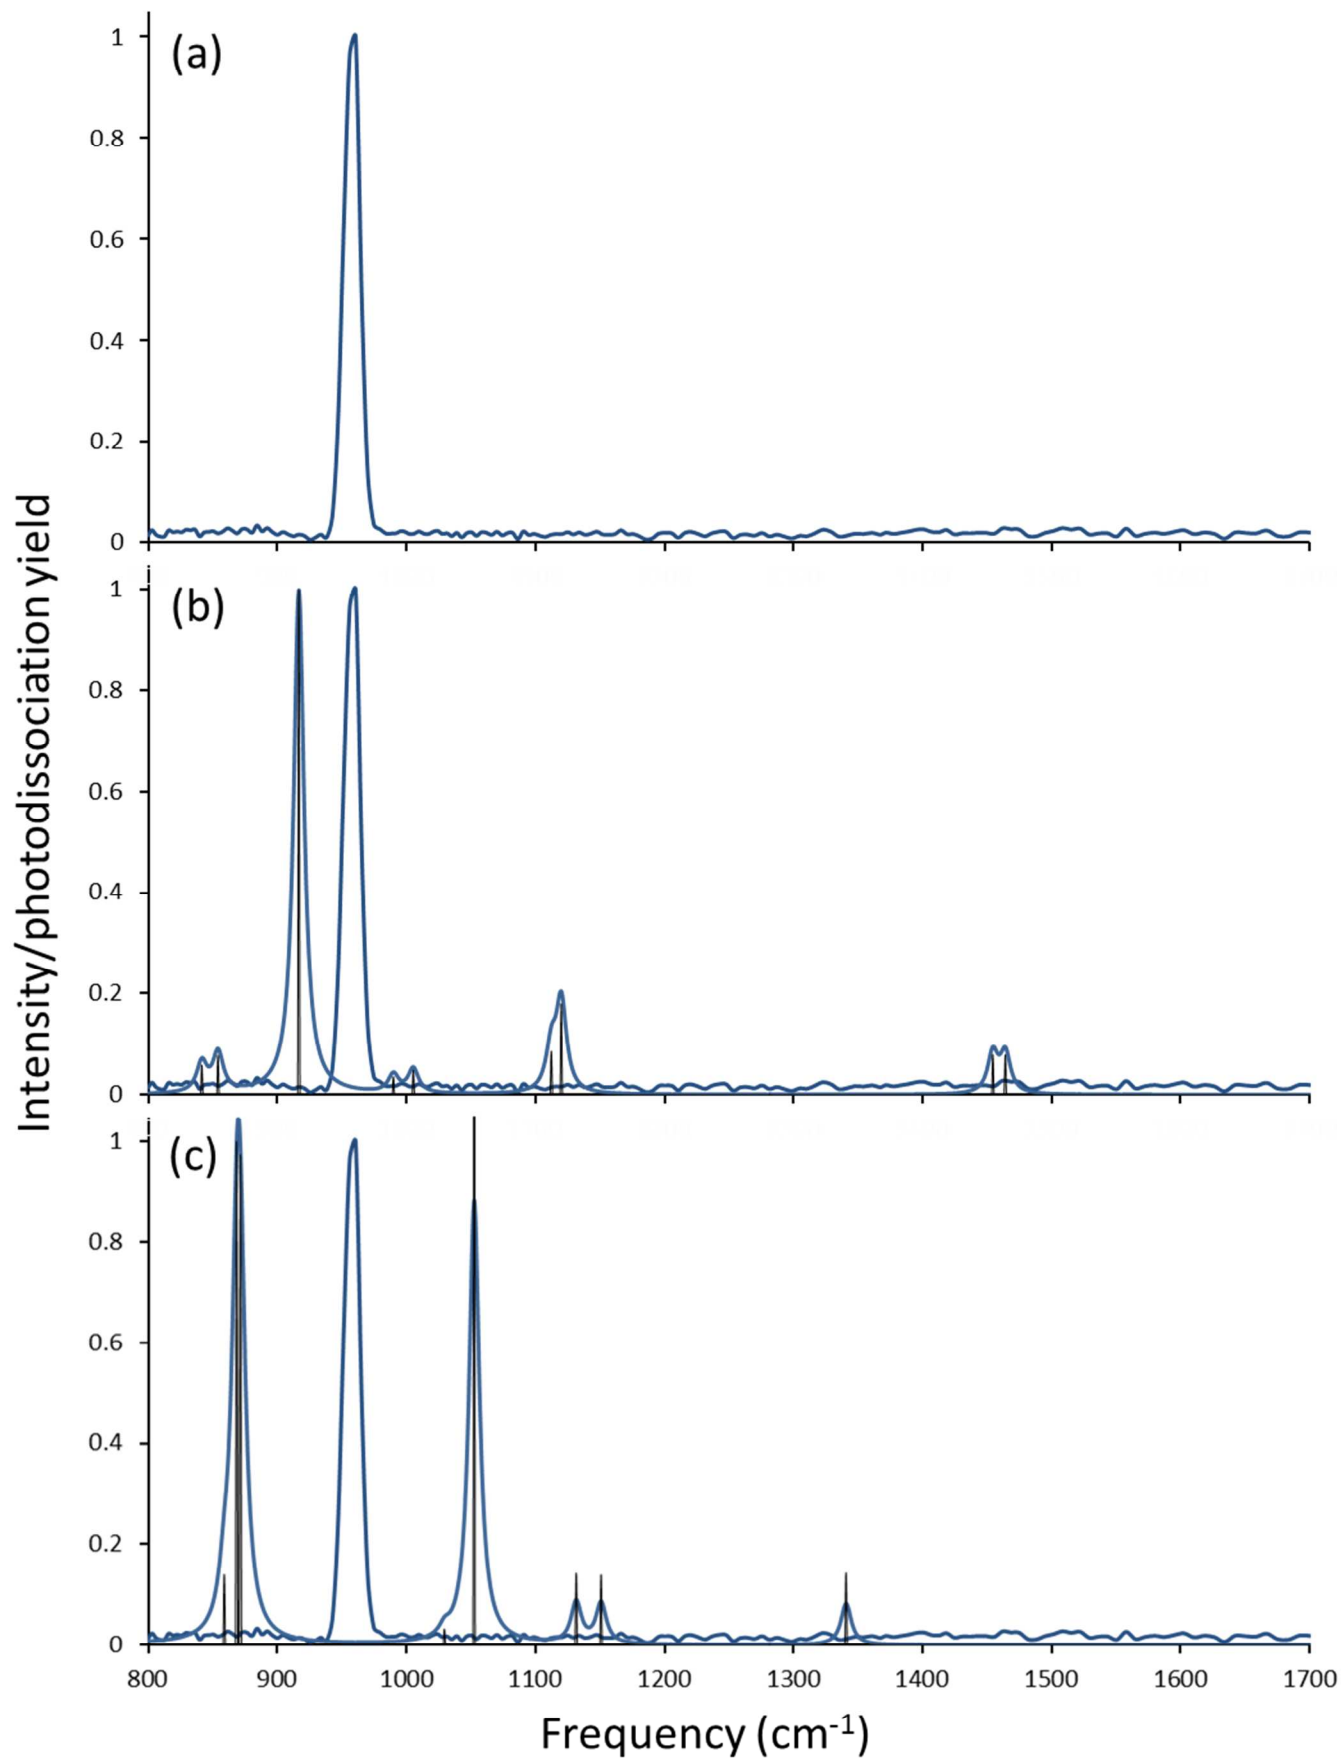

Figure S6.

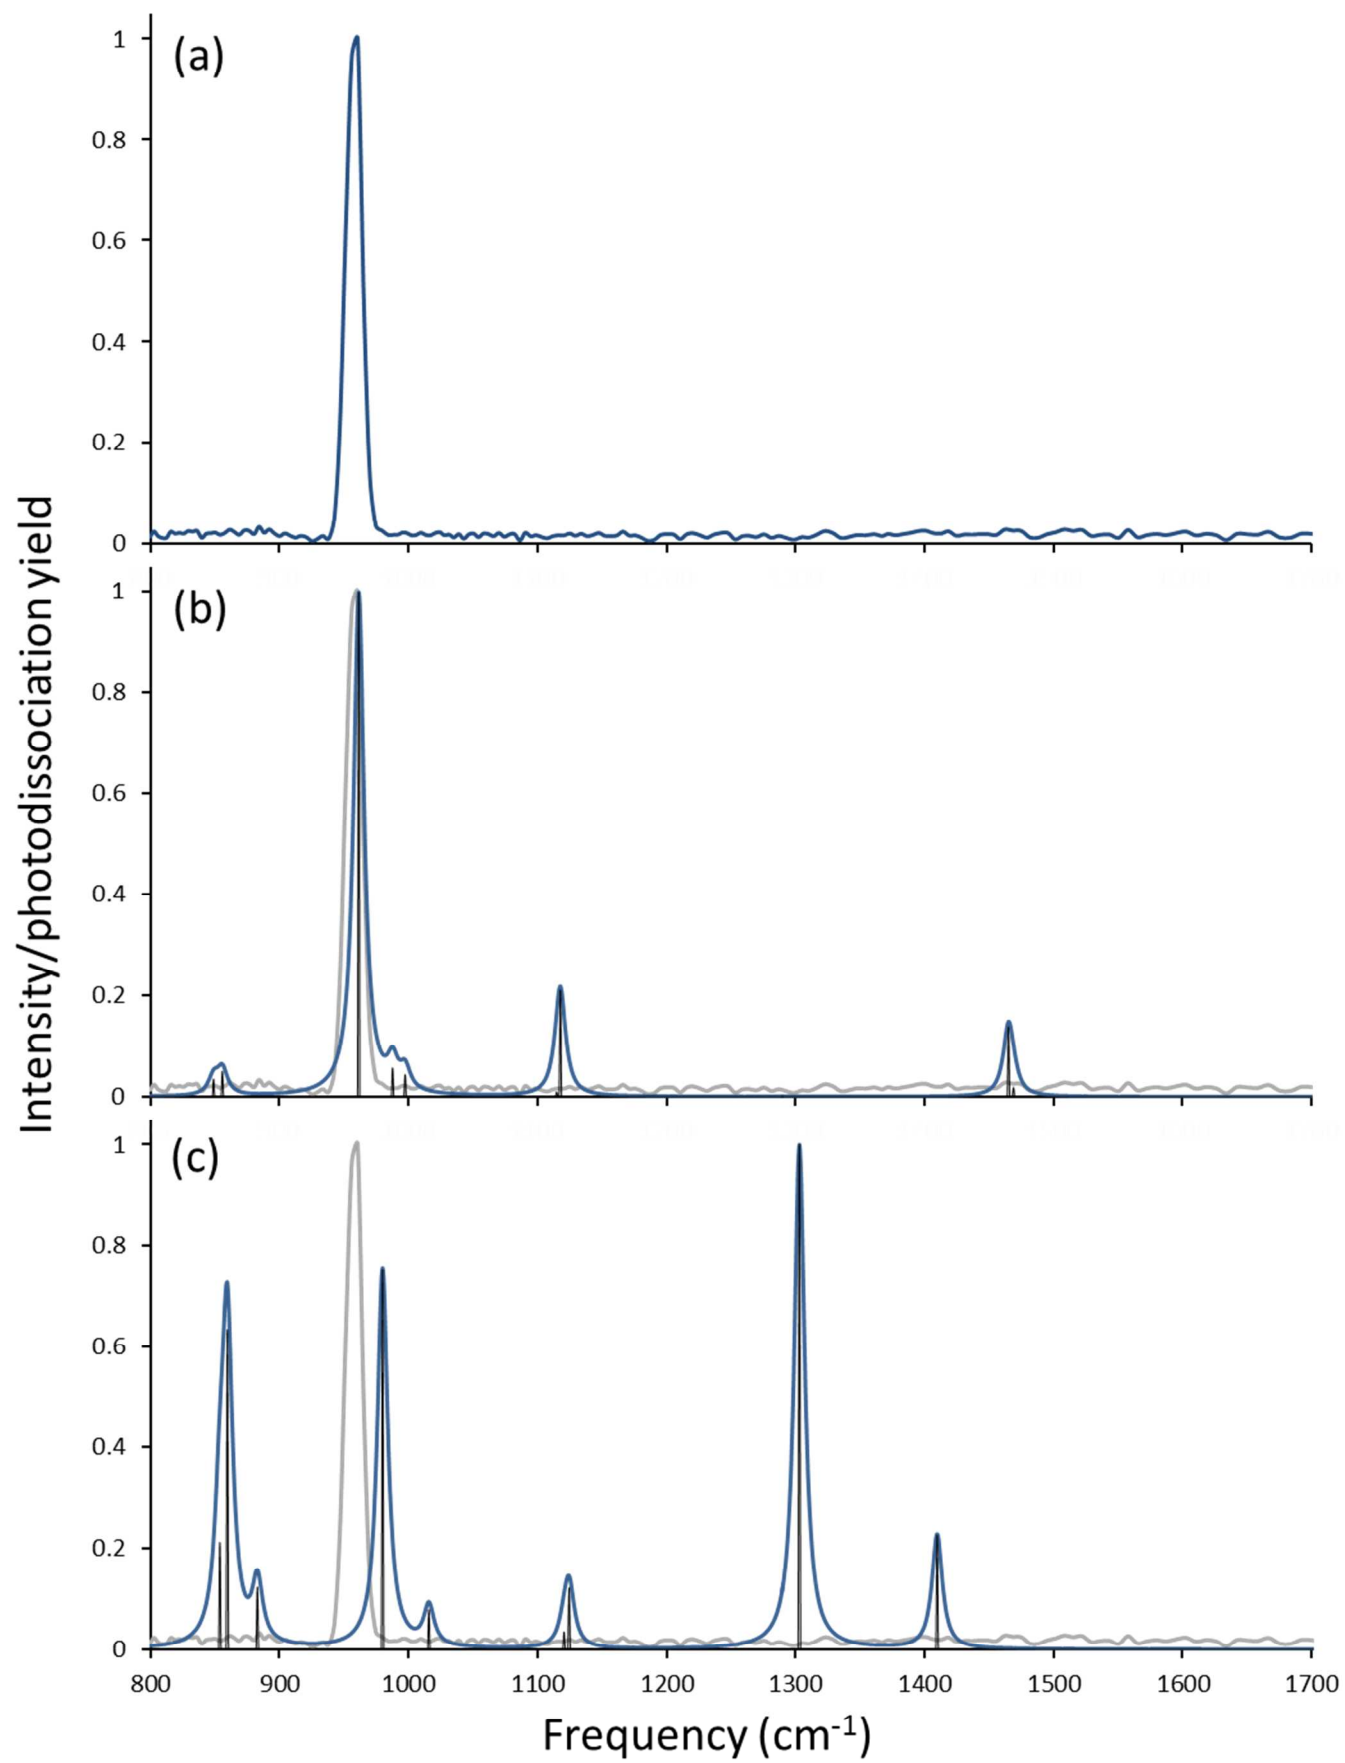

Figure S7.



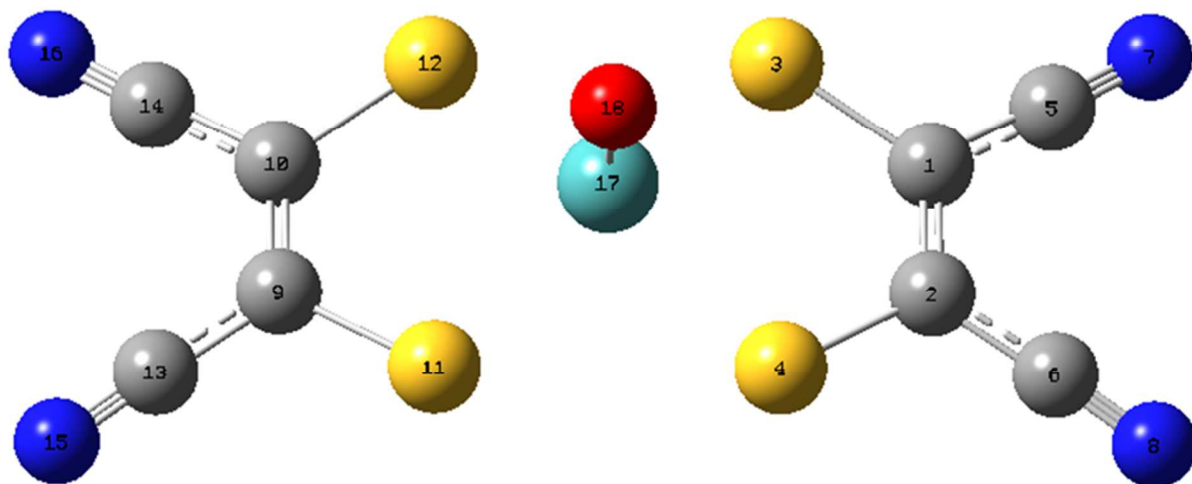

Figure S8.

Table S1.

|                                                  |                     |                    |                   |                   |
|--------------------------------------------------|---------------------|--------------------|-------------------|-------------------|
| [MoO(mnt) <sub>2</sub> ] <sup>2-</sup> , singlet | <b>D18-17-12-10</b> | <b>D18-17-11-9</b> | <b>D18-17-3-1</b> | <b>D18-17-4-2</b> |
| B3LYP/6-31G(d)                                   | -95.07              | 95.07              | 95.07             | -95.07            |
| B3LYP/6-311+G(d)                                 | -95.42              | 95.42              | 95.41             | -95.42            |
| B3LYP/6-311+G(3df)                               | -95.55              | 95.55              | 95.53             | -95.53            |
| M06-L/6-311+G(d)                                 | -95.67              | 95.68              | 95.68             | -95.67            |
| [MoO(mnt) <sub>2</sub> ], doublet                | <b>D18-17-12-10</b> | <b>D18-17-11-9</b> | <b>D18-17-3-1</b> | <b>D18-17-4-2</b> |
| B3LYP/6-31G(d)                                   | -114.51             | 114.51             | 80.56             | -80.56            |
| B3LYP/6-311+G(d)                                 | -115.00             | 115.00             | 81.23             | -81.23            |
| B3LYP/6-311+G(3df)                               | -114.38             | 114.37             | 81.75             | -81.75            |
| M06-L/6-311+G(d)                                 | -114.85             | 114.85             | 79.25             | -79.25            |
| [MoO(mnt) <sub>2</sub> ], quartet                | <b>D18-17-12-10</b> | <b>D18-17-11-9</b> | <b>D18-17-3-1</b> | <b>D18-17-4-2</b> |
| B3LYP/6-31G(d)                                   | -108.45             | 117.21             | 124.06            | -75.58            |
| B3LYP/6-311+G(d)                                 | -108.61             | 117.94             | 125.03            | -76.03            |
| B3LYP/6-311+G(3df)                               | -109.02             | 116.51             | 123.92            | -75.54            |
| M06-L/6-311+G(d)                                 | -108.82             | 120.19             | 133.65            | -76.66            |
